# Supplementary material for: A cellular model of albumin endocytosis uncovers a link between membrane and nuclear proteins
Source: Oxford University Press journal article supplement (doi:10.1242/jcs.242859), 2020-06-01
Supplement: jcs242859supp.pdf [file jcs242859supp.pdf]

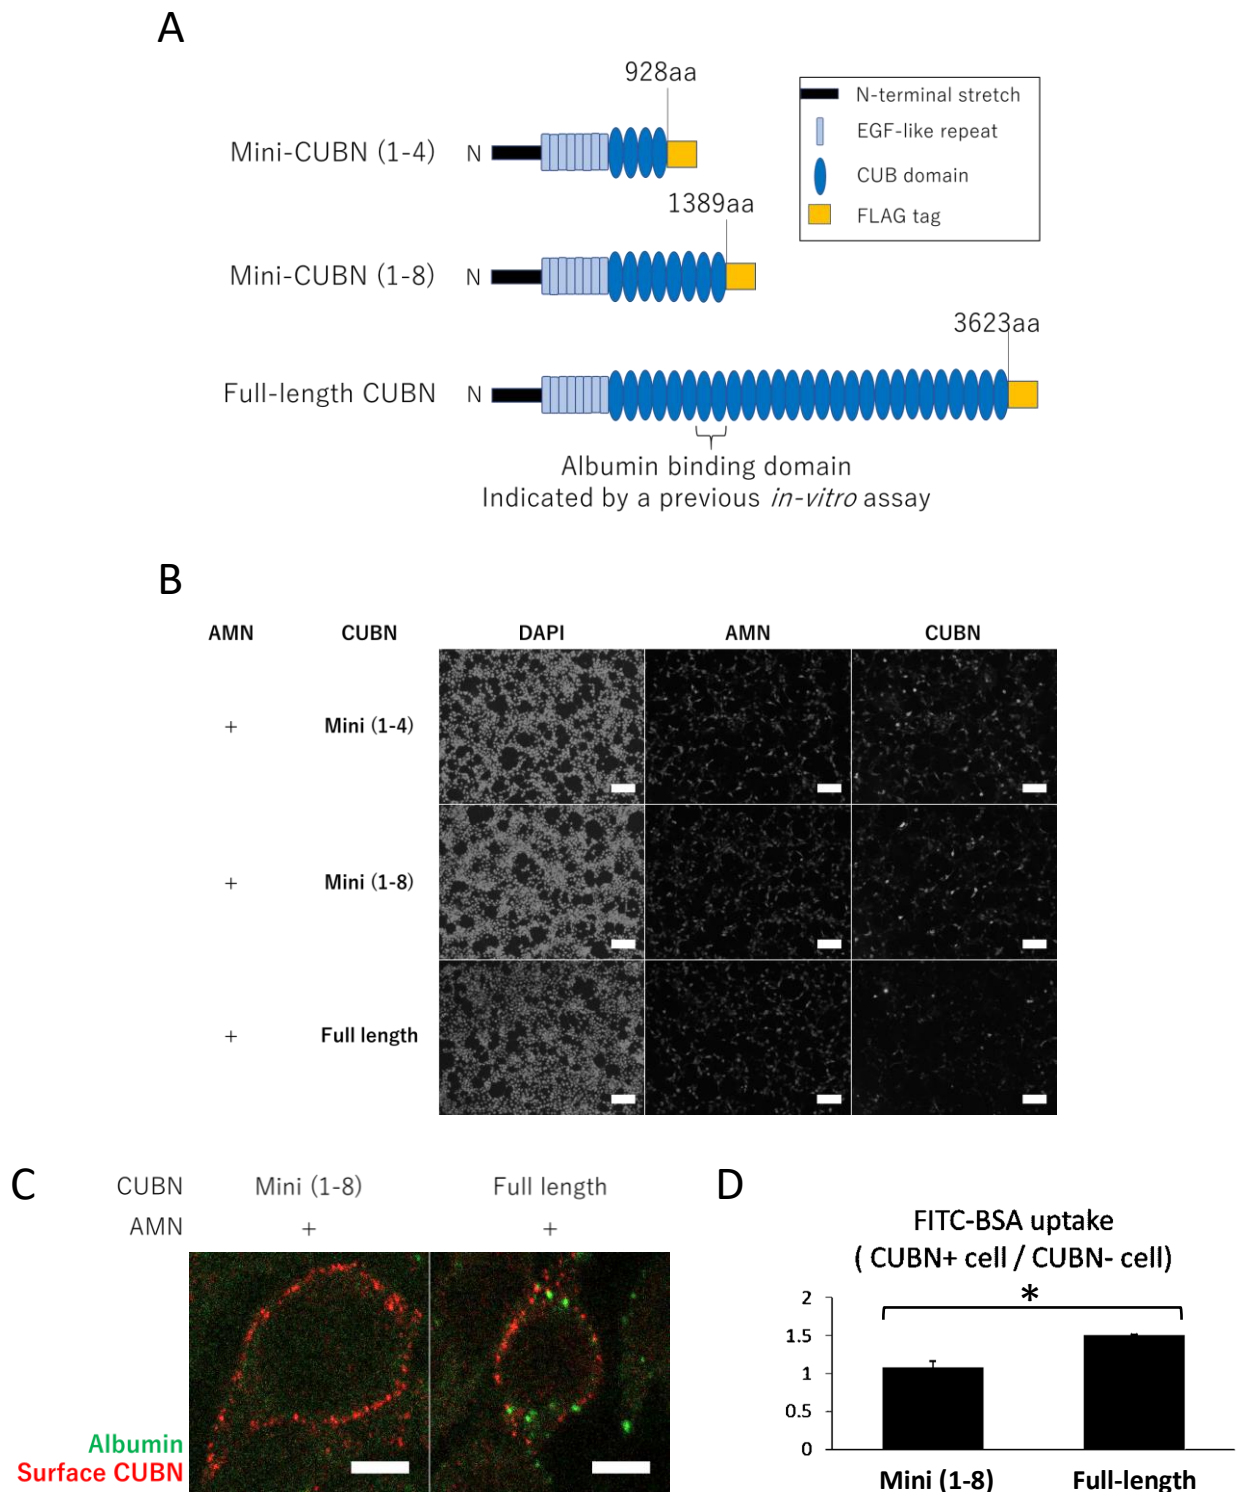

**Figure S1. A CUBN segment stretching from the N-terminus to CUB 8 domain fails to facilitate cellular albumin uptake.**

A Schematic representation of mini-CUBN (1–4), mini-CUBN (1–8), and full-length CUBN.

B Expression of FLAG-tagged mini-CUBN (1–4), mini-CUBN (1–8), and full-length CUBN co-expressed with myc-GFP-tagged AMN in HEK293T cells. Scale bar = 100  $\mu$ m.

C FITC-albumin uptake by HEK293T cells expressing mini-CUBN (1–8) or full-length CUBN with AMN. Cells were immunostained for surface CUBN after FITC-albumin uptake. Scale bar = 5  $\mu$ m.

D Flow cytometric quantification of FITC-albumin uptake by HEK293T cells expressing mini-CUBN (1–8) or full-length CUBN on their surface as in Figure 1E. Data are shown as mean  $\pm$  s. e. m., n = 3. \* $P$  < 0.05, two-sided *t*-test.

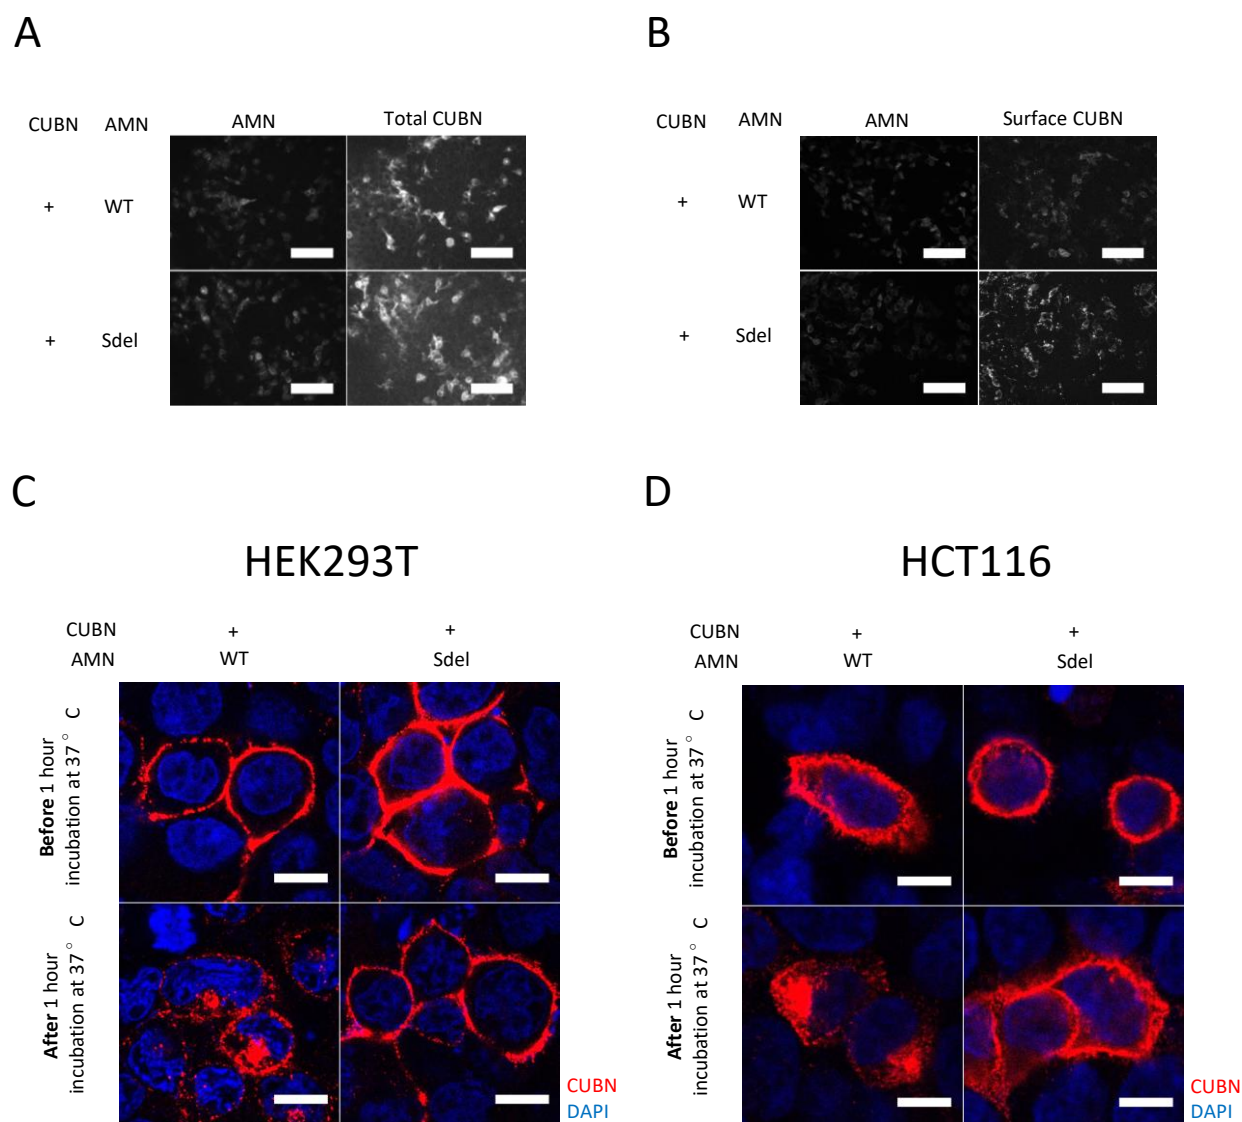

**Figure S2. Signal motifs of AMN are critical for CUBN endocytosis in cells with or without endogenous megalin.**

A, B Total expression (A) and membrane expression (B) of FLAG-tagged full-length CUBN in HEK293T cells co-expressing myc-GFP-tagged WT-AMN or Sdel-AMN. Scale bar = 100  $\mu$ m.

C, D HEK293T (C) or HCT116 (D) cells were co-transfected with FLAG-tagged CUBN and myc-tagged WT-AMN or Sdel-AMN. FLAG-CUBN on the cell surface was detected before or after the endocytosis period (37° C, 1 h). Scale bar = 10  $\mu$ m.

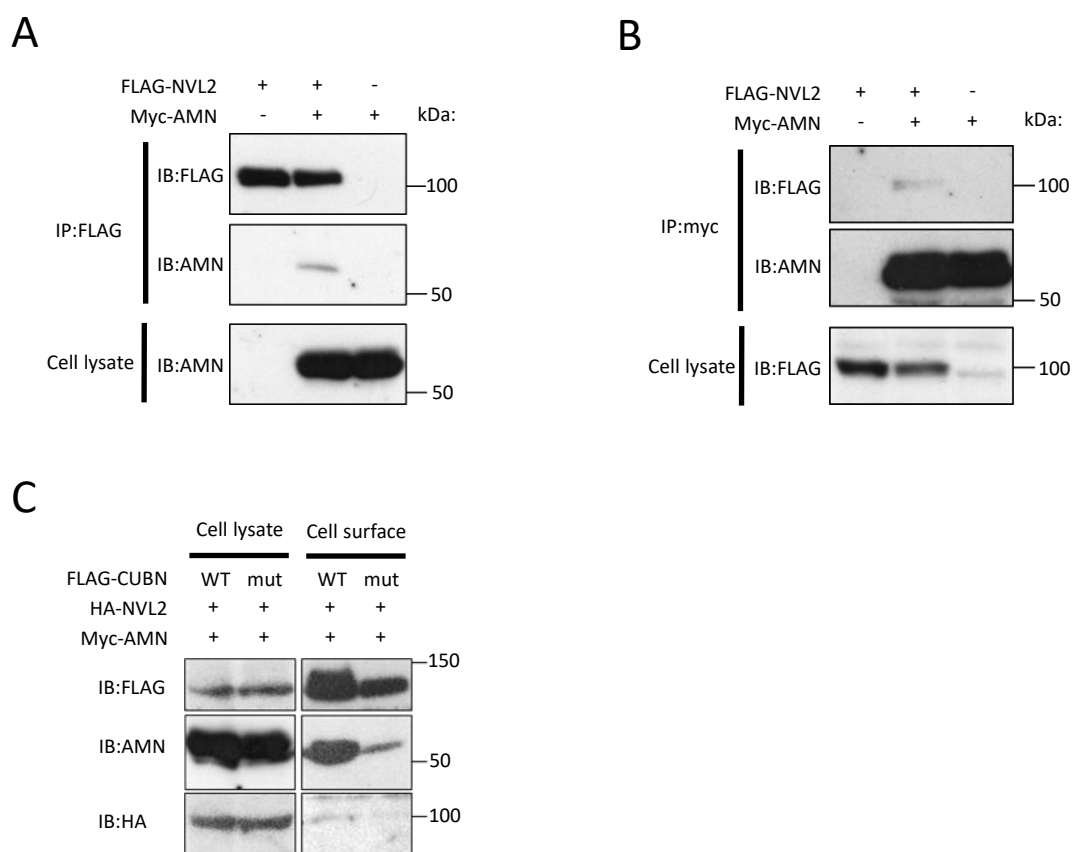

**Figure S3. NVL2 interacts with AMN and CUBAM.**

A, B Coimmunoprecipitation of myc-tagged AMN and FLAG-tagged NVL2 exogenously expressed in HEK293T cells.

C Immunoprecipitation of WT or mutant (G653R) CUBN expressed on the cell surface. FLAG-tagged CUBN on cell surface was labelled with anti-FLAG antibody in cultured medium and its bound proteins were analyzed by western blot.

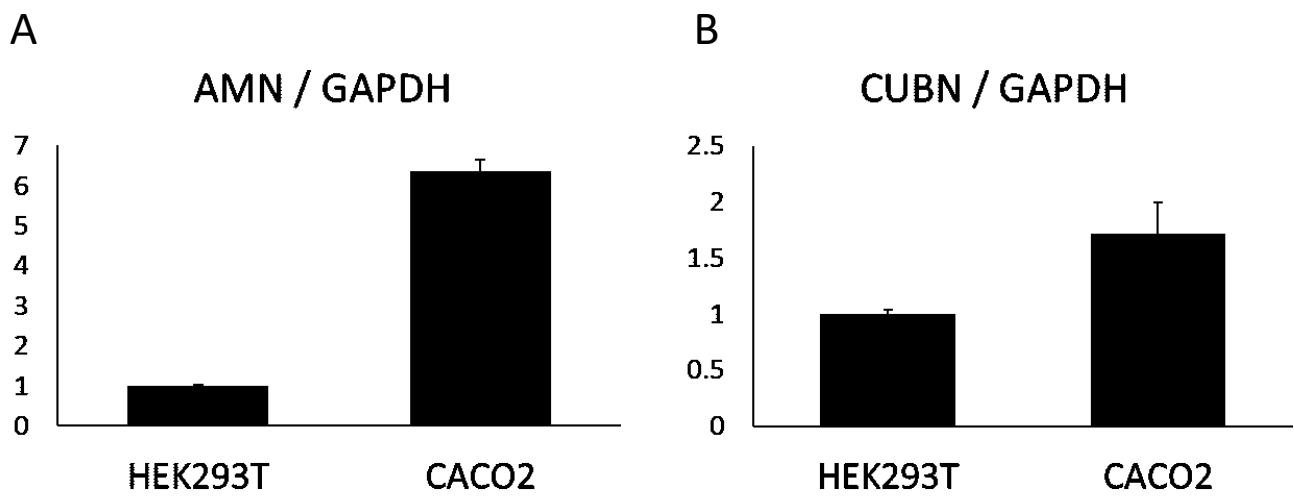

**Figure S4. CACO2 cells, but not HEK293T cells, express endogenous AMN and CUBN mRNA.**

A, B AMN (A) and CUBN (B) mRNA levels normalized to GAPDH mRNA in HEK293T and CACO2 cells were evaluated by qPCR.

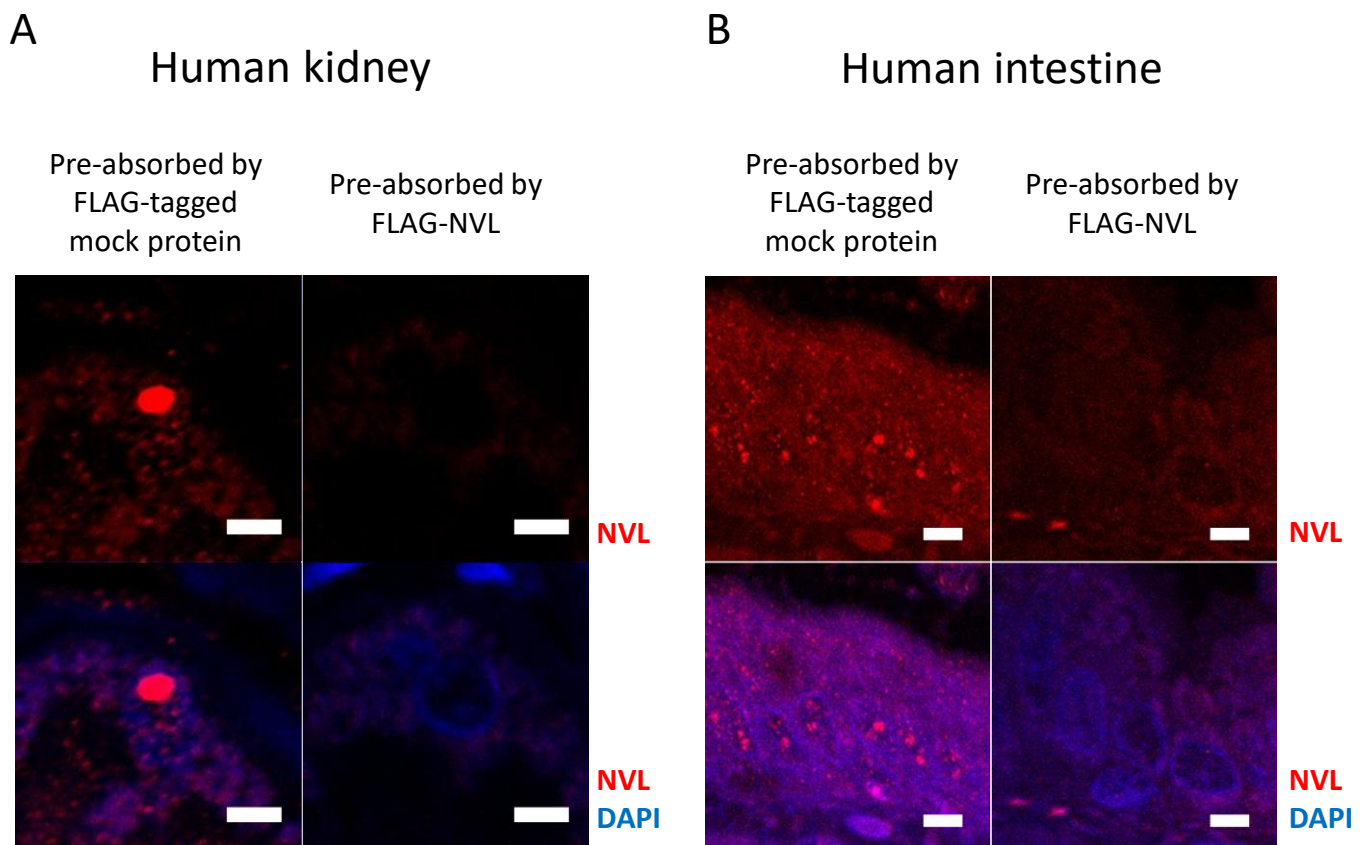

**Figure S5. Immunofluorescence signals are specificity of signals for NVL in human kidney and intestine.**

A, B Human kidney(A) and intestine(B) sections were immunostained with anti-NVL antibody pre-absorbed by anti-FLAG immunoprecipitates from lysates of HEK293T cells expressing FLAG-tagged negative control protein (FLAG-KLHL3) or FLAG-NVL2. Scale bar = 5  $\mu$ m

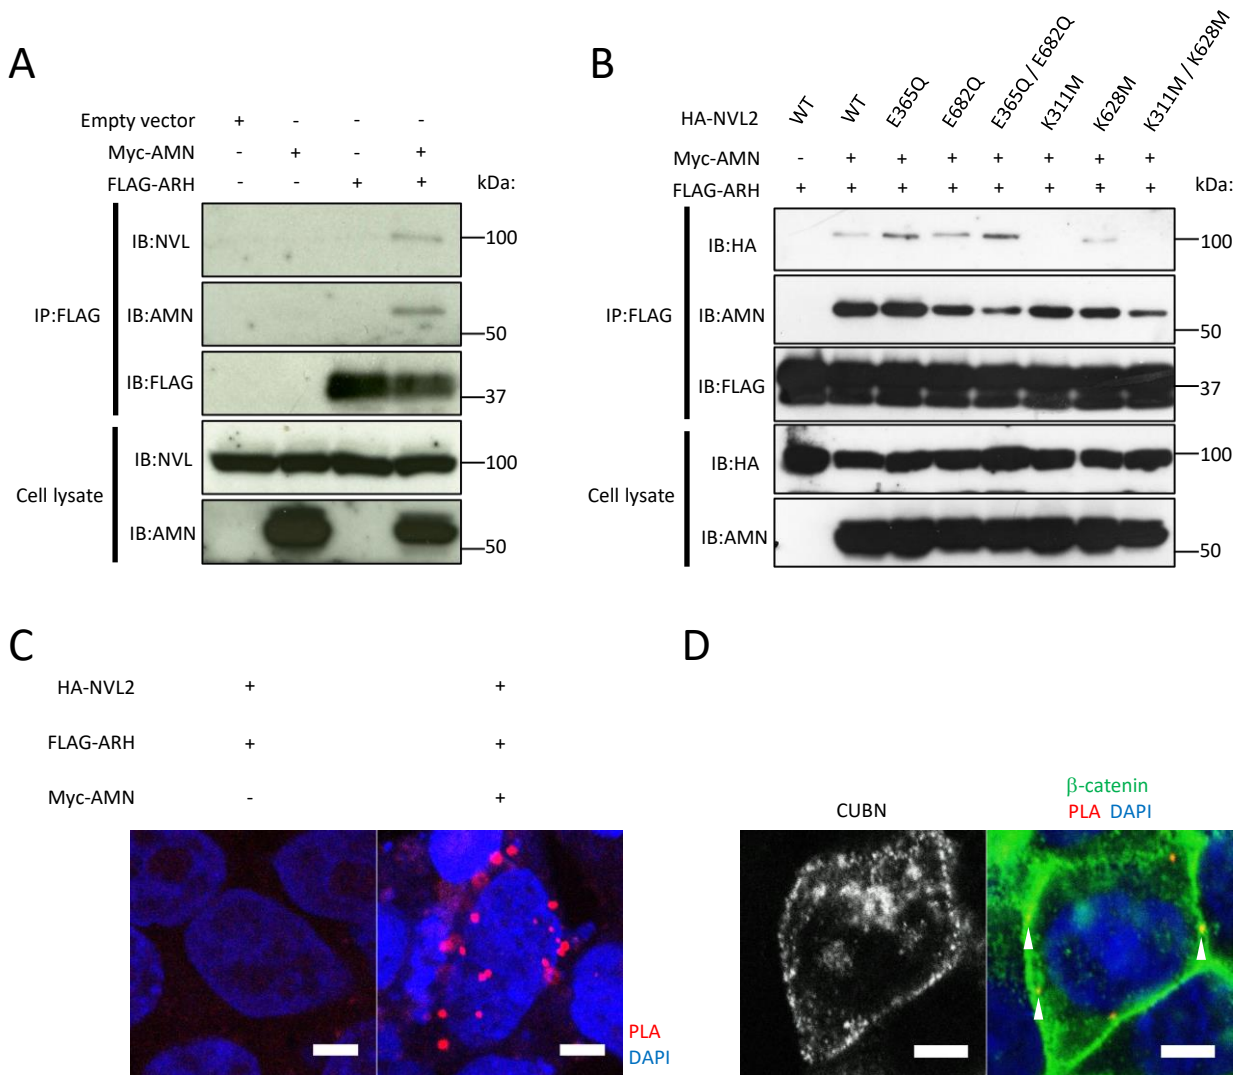

**Figure S6. NVL2 forms a trimeric complex with ARH and AMN.**

A Co-immunoprecipitation of endogenous NVL2 with exogenously expressed AMN and ARH in HEK293T. Cell lysates and anti-FLAG immunoprecipitates were analyzed using the indicated antibodies.

B Co-immunoprecipitation of HA-tagged WT or mutant NVL2 with AMN and ARH exogenously expressed in HEK 293T cells.

C In situ PLA of HA-tagged NVL2 and FLAG-tagged ARH in HEK293T cells with or without AMN coexpression. Scale bar = 5  $\mu$ m.

D In situ PLA of HA-tagged NVL2 and FLAG-tagged ARH in HEK293T cells coexpressing myc-tagged AMN and GFP-tagged CUBN. Cells were immunostained for  $\beta$ -catenin after the PLAs. Scale bar = 5  $\mu$ m.



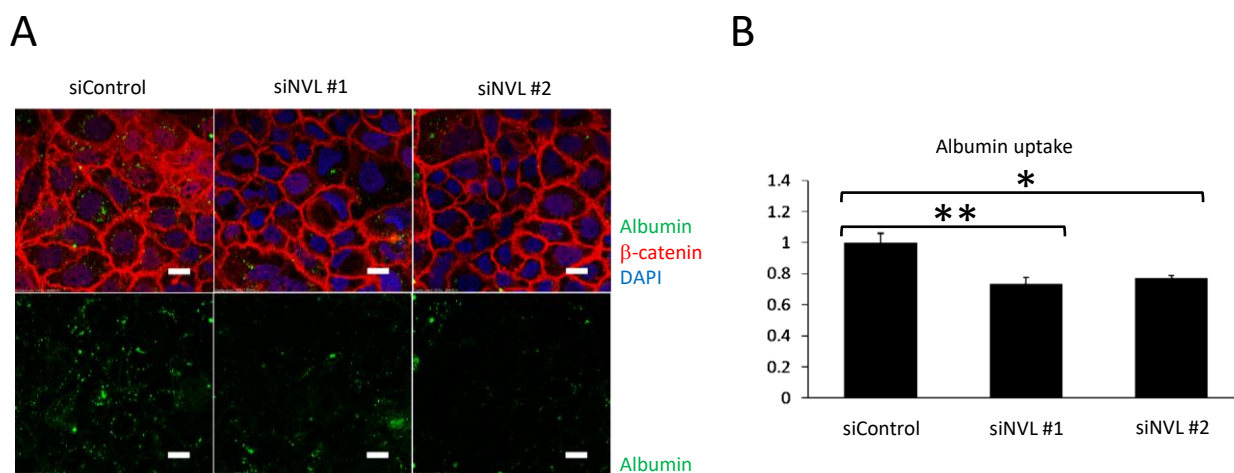

**Figure S7. NVL depletion reduces albumin uptake in CACO2 cells.**

A FITC-albumin uptake by CACO2 cells transfected with the indicated siRNAs. Cells were immunostained for β-catenin after FITC-albumin uptake. Scale bar = 20 μm.

B Quantification of FITC-albumin uptake by CACO2 cells transfected with the indicated siRNAs. Median FITC signal intensity of each cell group was measured by flow cytometry. Data are shown as mean ± s. e. m., n = 6. \* $P < 0.05$ , \*\* $P < 0.01$ , two-sided  $t$ -test.

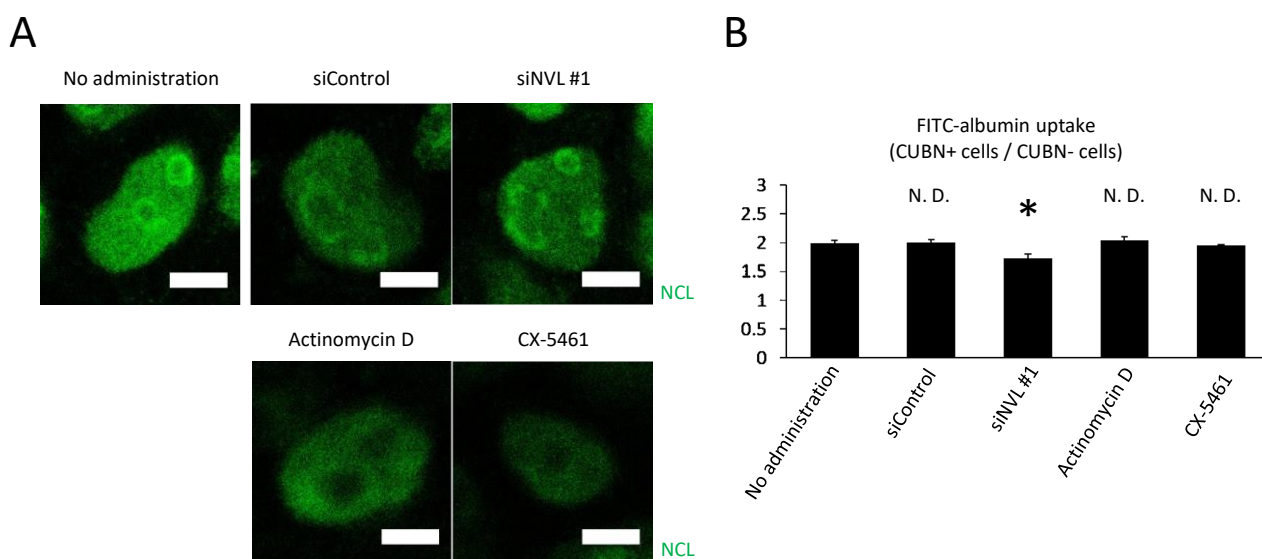

**Figure S8. NVL2 promotes albumin endocytosis independently of nucleolar stress.**

A Localization of nucleolin (NCL) in HEK293T cells transfected with siNVL, or incubated with media containing actinomycin D or CX-5461. Scale bar = 5  $\mu$ m.

B Flow cytometric quantification of FITC-albumin uptake in HEK293T cells transfected with siNVL, or incubated with media containing actinomycin D or CX-5461 as in Figure 1E. Data are shown as mean  $\pm$  s. e. m., n=3. N. D. = no difference, \*P < 0.05, two-sided t-test.
